# Supplementary material for: Transthyretin amyloidosis prevalence and characteristics in Korean patients with heart failure with preserved or mildly reduced ejection fractions
Source: PubMed Central journal article supplement — Sci Rep. 2024 Oct 1;14:22863. doi: 10.1038/s41598-024-74191-0 (PMC11445427; doi:10.1038/s41598-024-74191-0), 2024-10-01

**Supplementary Figure S1.** Prevalence of ATTR-CM according to maximal LV wall thickness. ATTR-CM, transthyretin amyloid cardiomyopathy; MWT, maximal LV wall thickness.

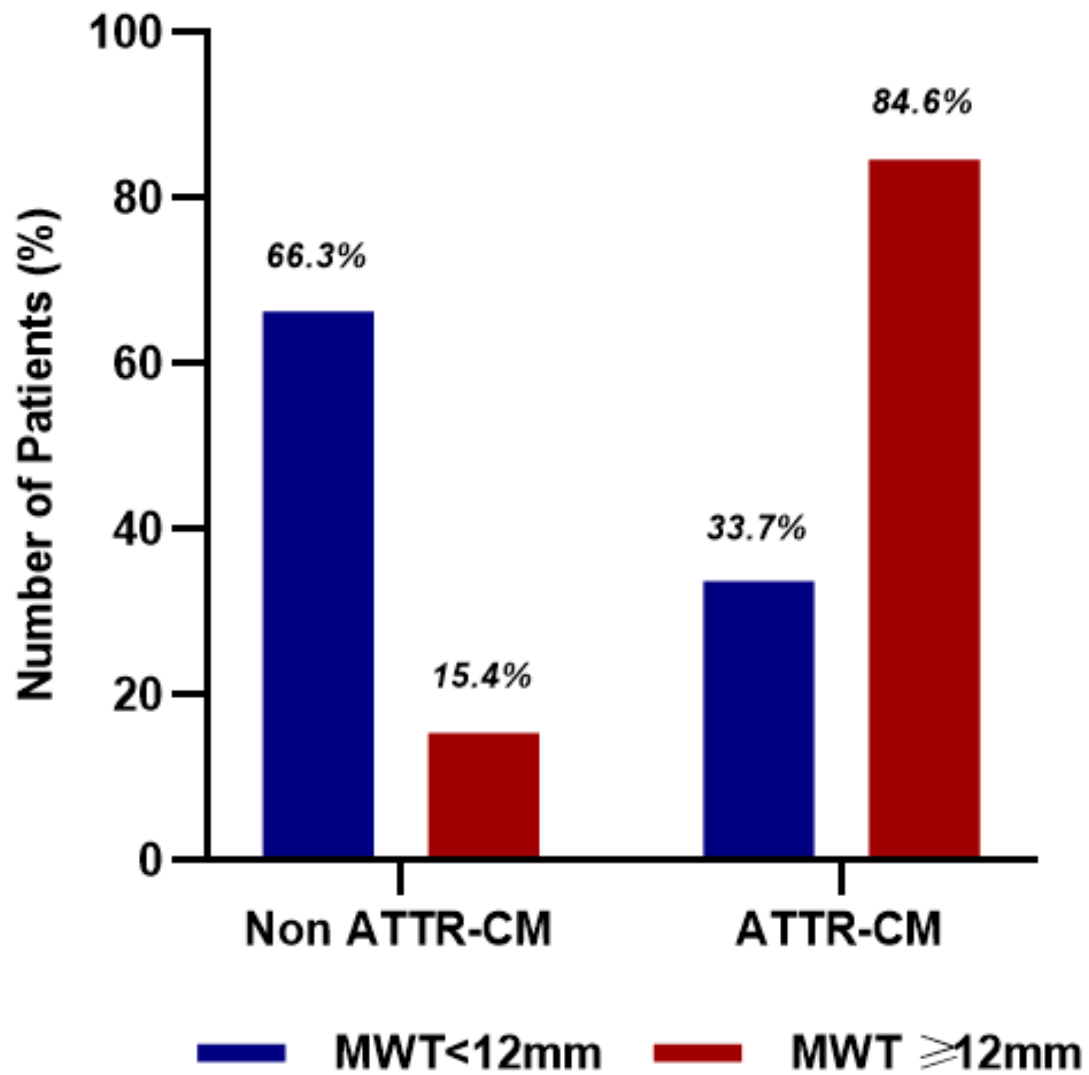

**Supplementary Figure S2.** Comparison of ATTR-CM prevalence in patients according to PR interval, E/e', and left ventricular mass index. ATTR-CM, transthyretin amyloid cardiomyopathy; LVMI, left ventricular mass index.

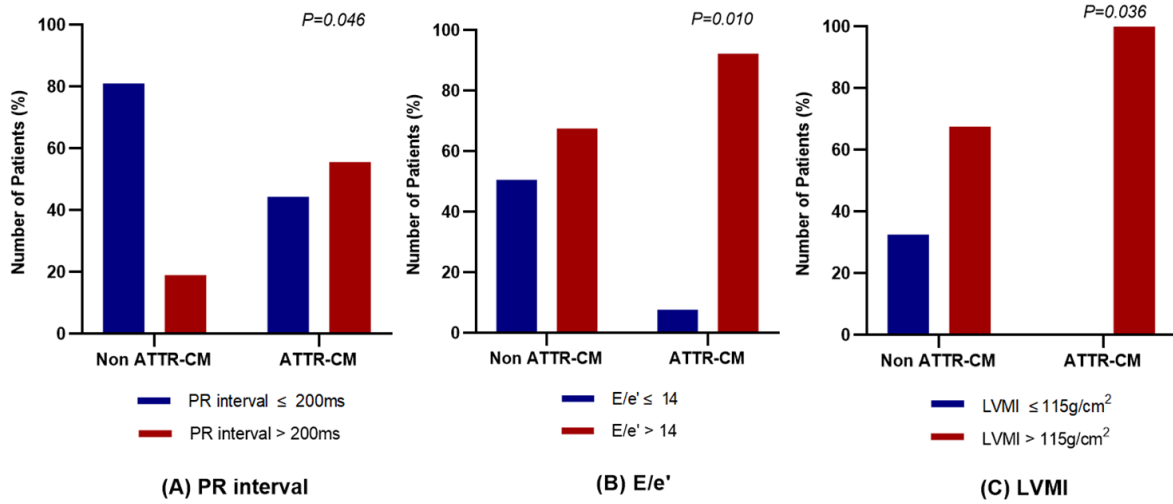

Supplementary Figure S3. The estimated sample size.

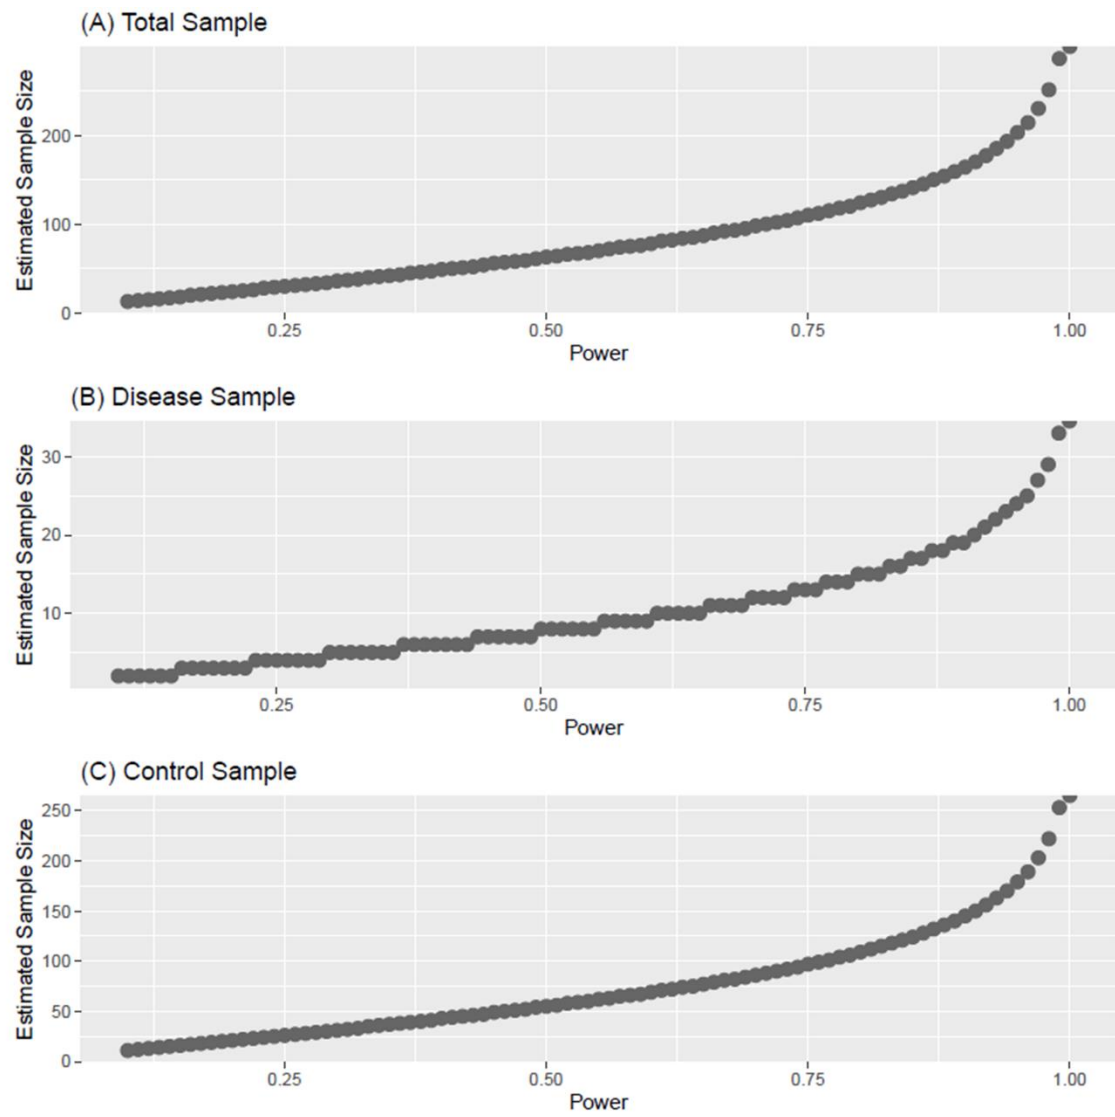

Supplement: 41598_2024_74191_MOESM1_ESM.pdf [file 41598_2024_74191_MOESM1_ESM.pdf]
